# Supplementary material
Source: PubMed Central journal article supplement (PMC4096154)

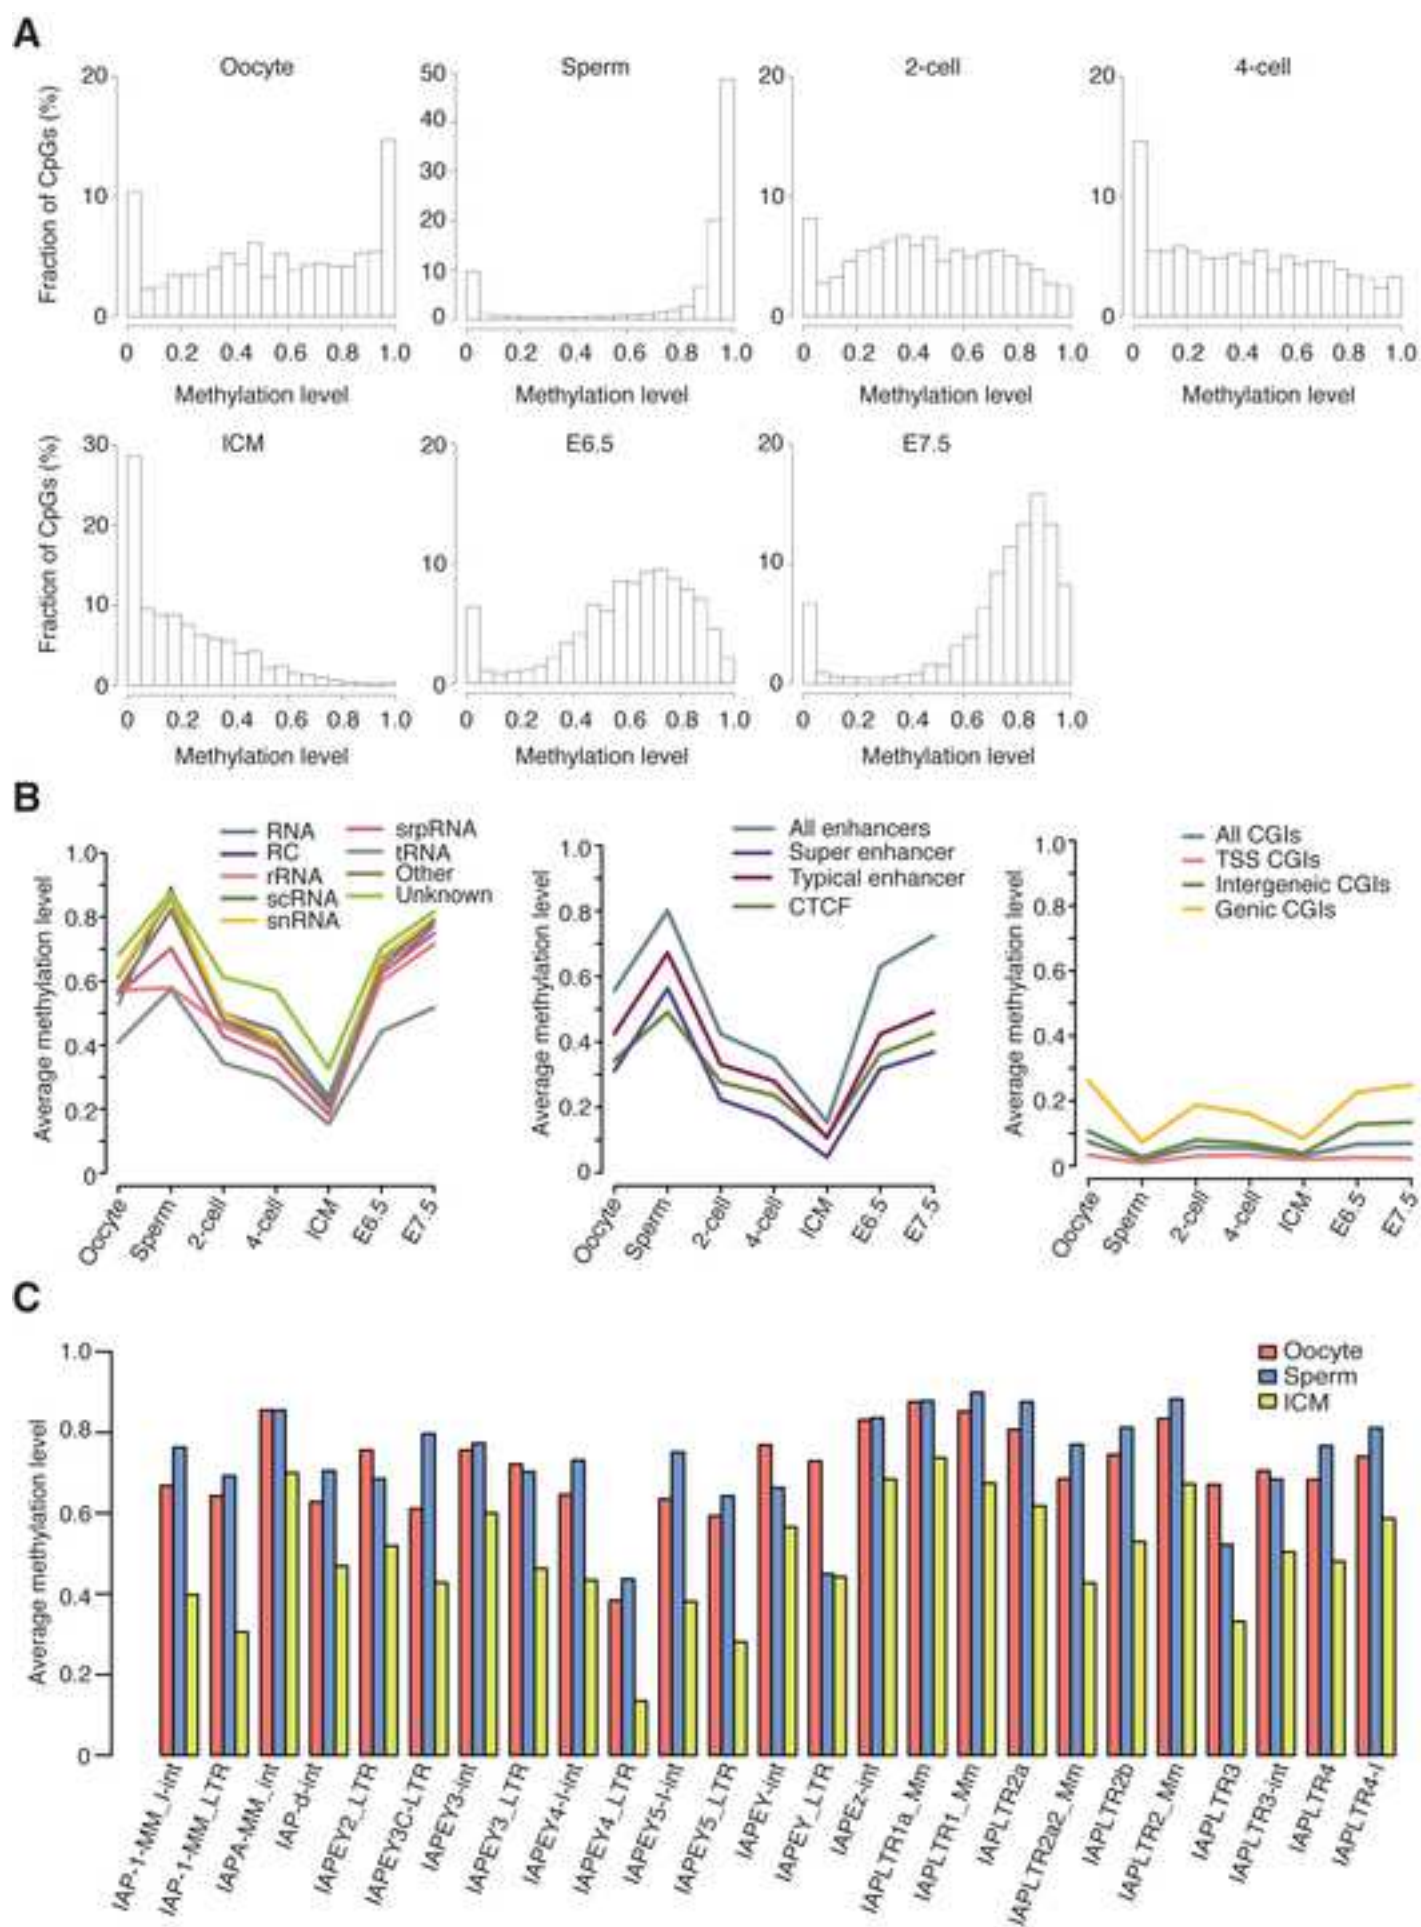

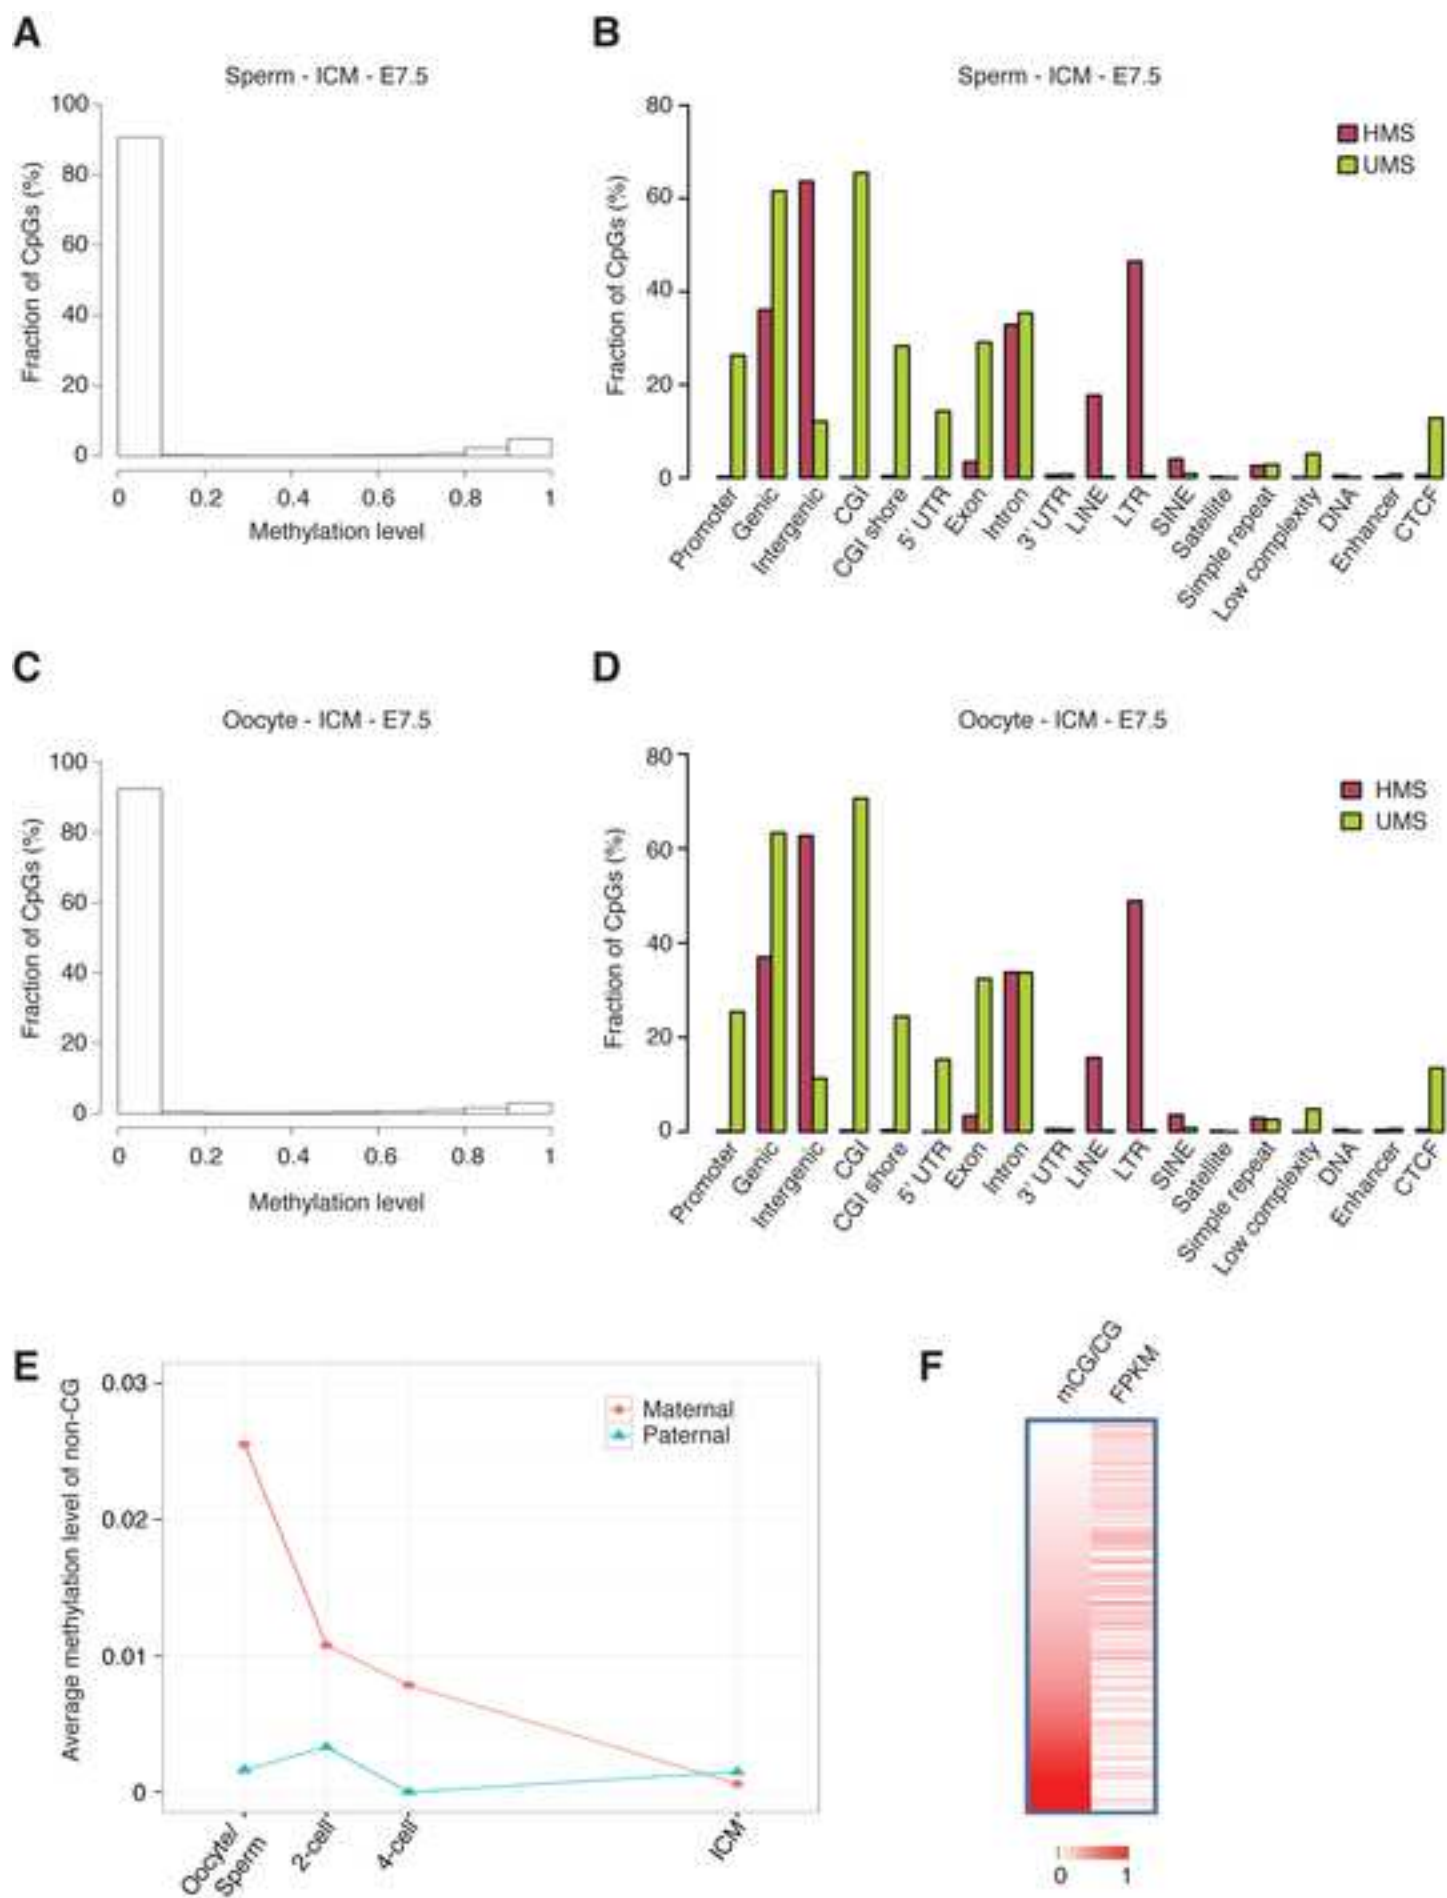

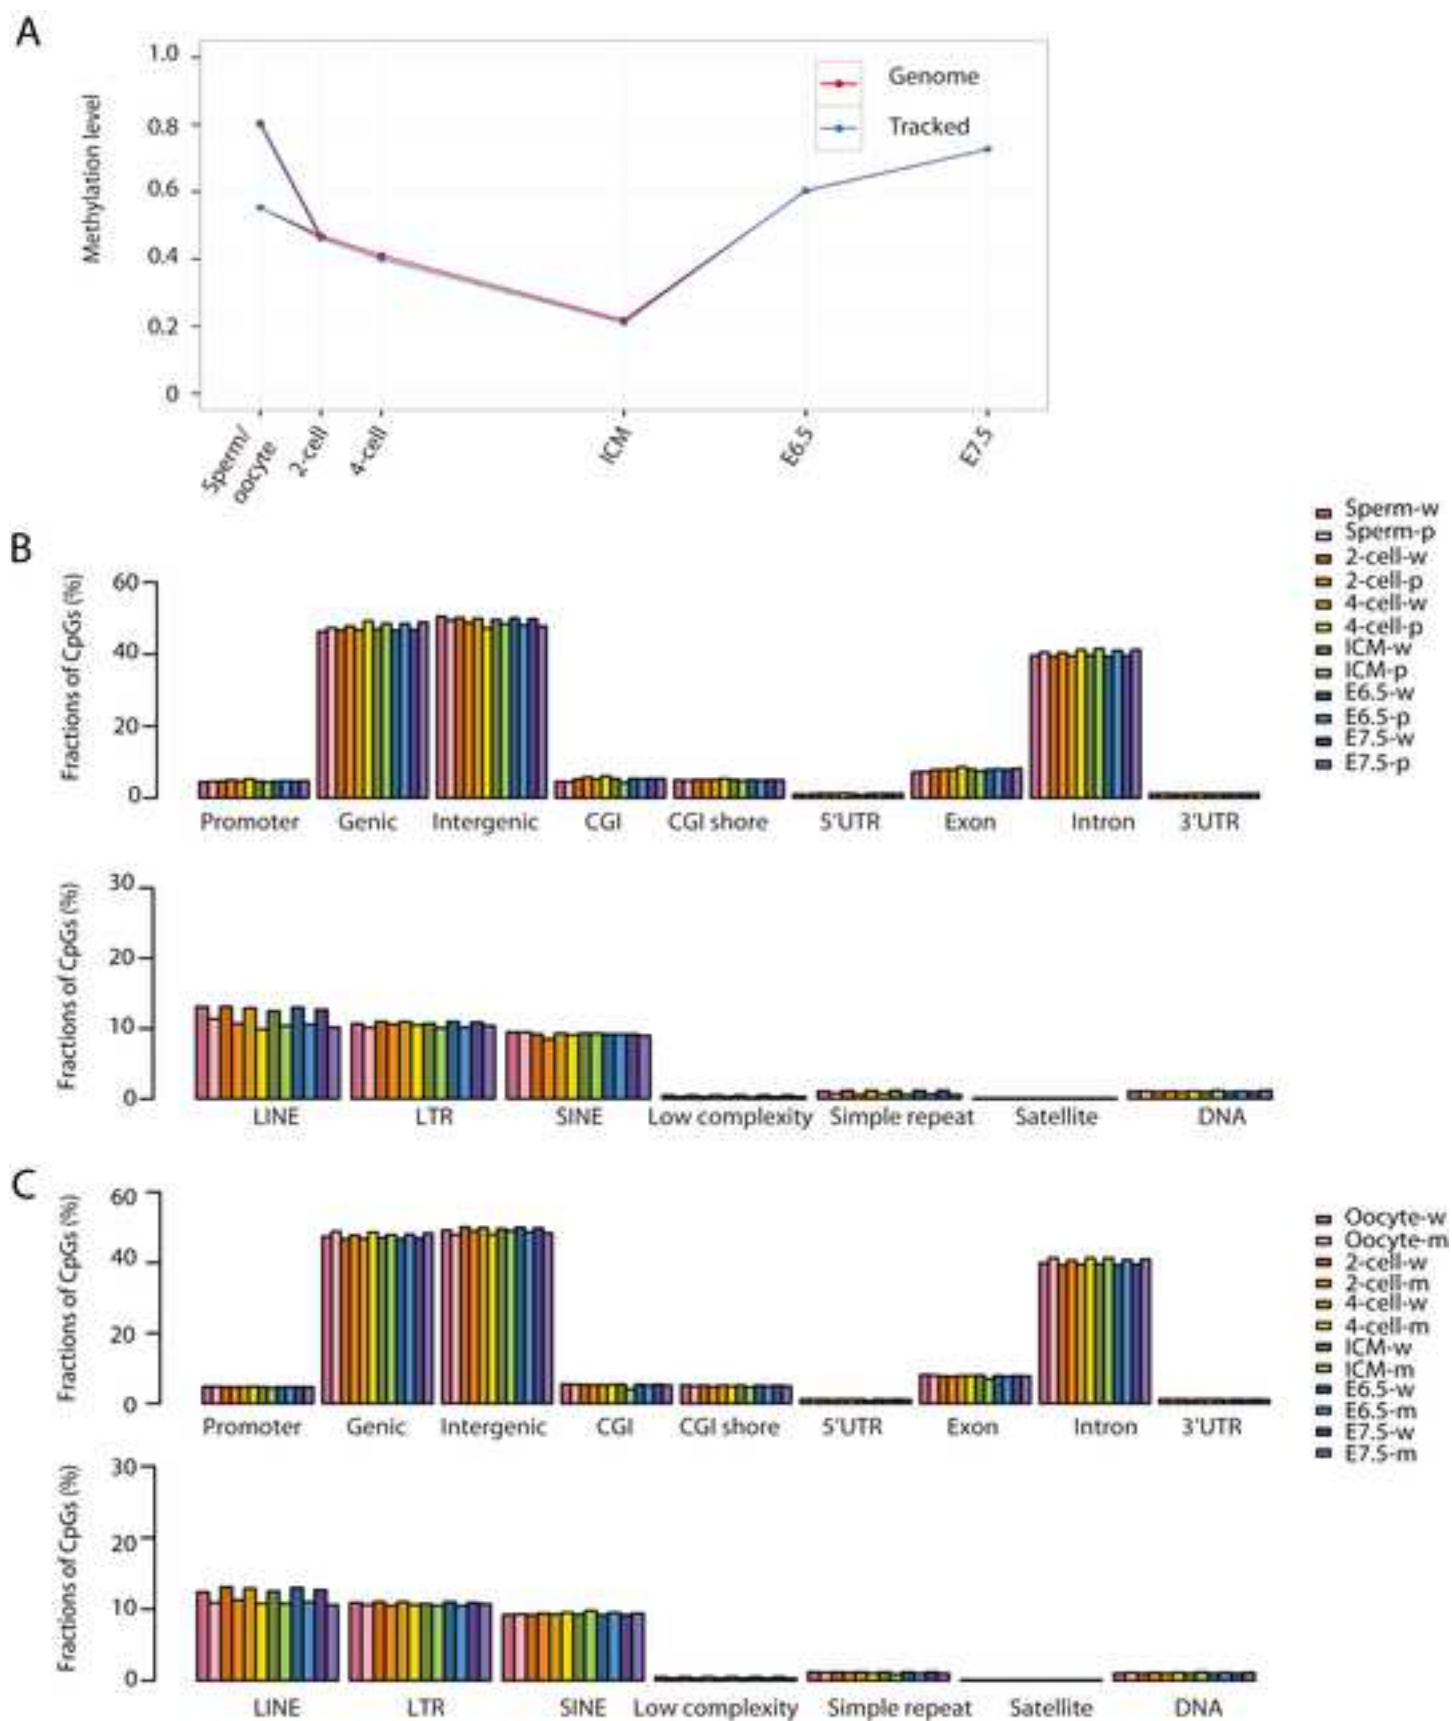

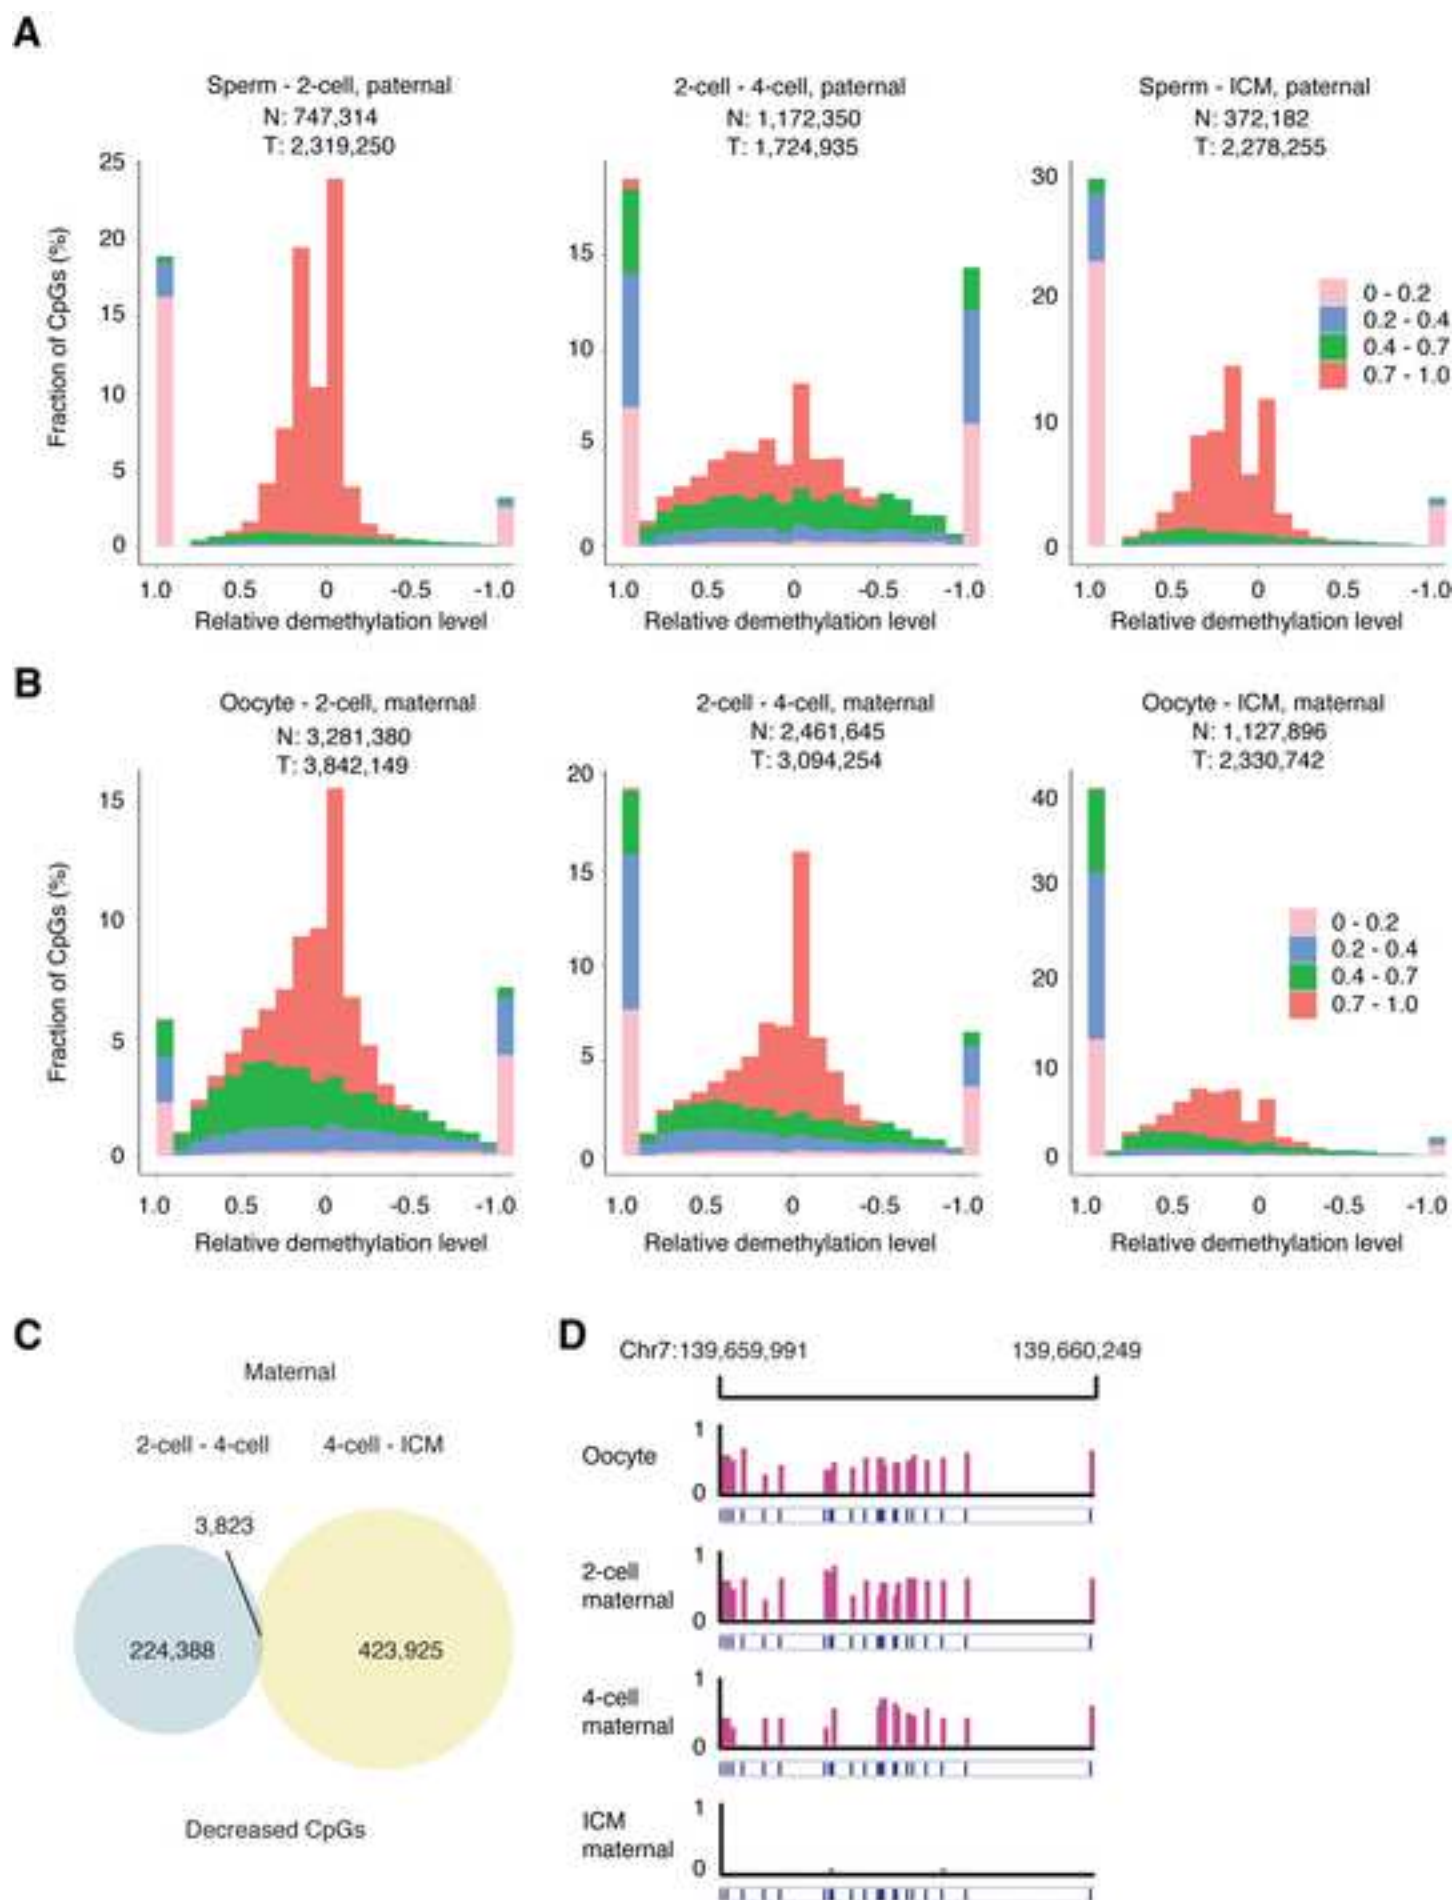

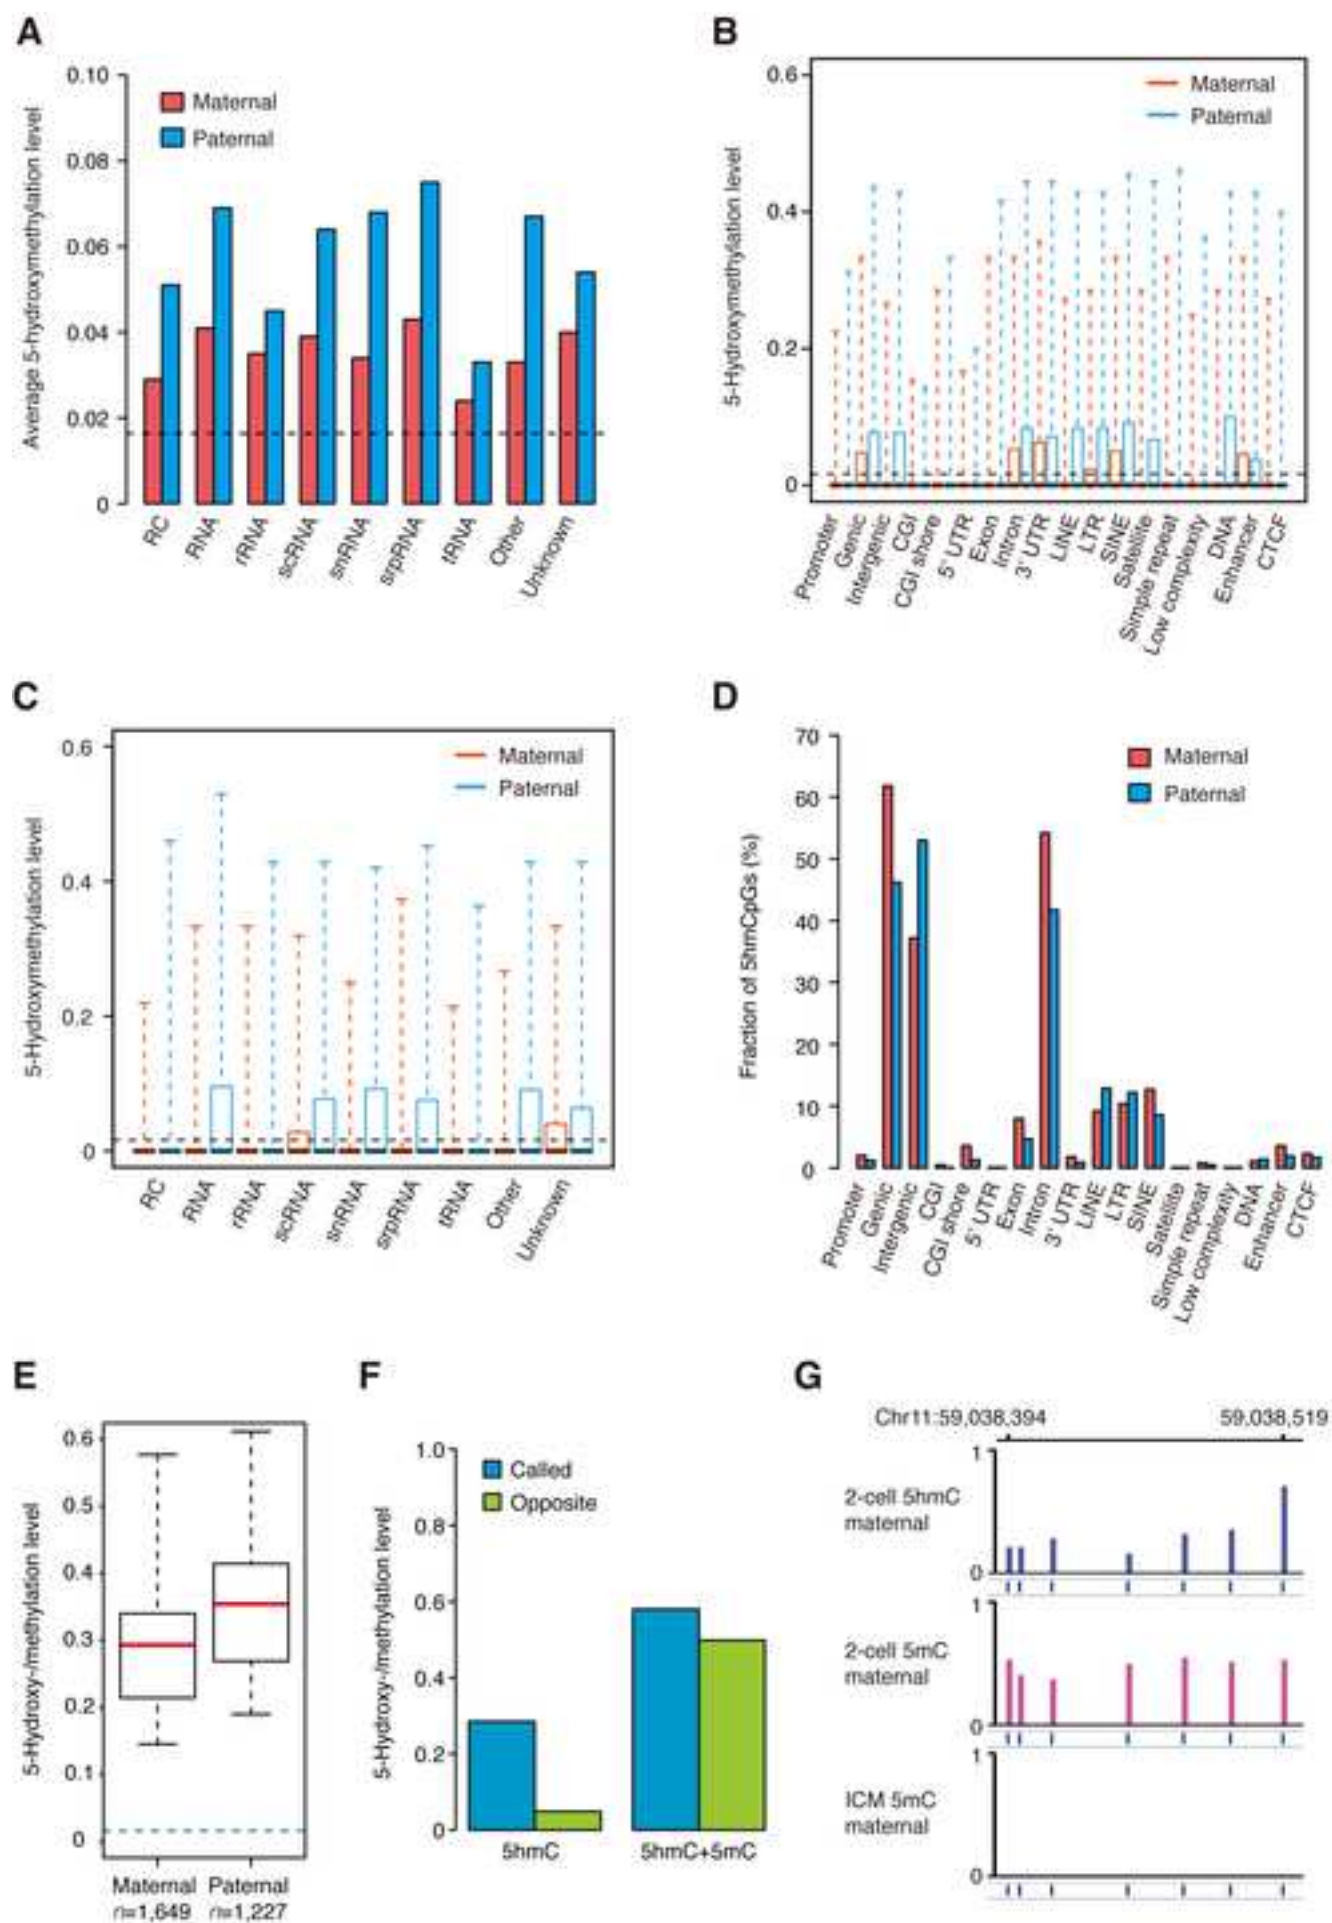

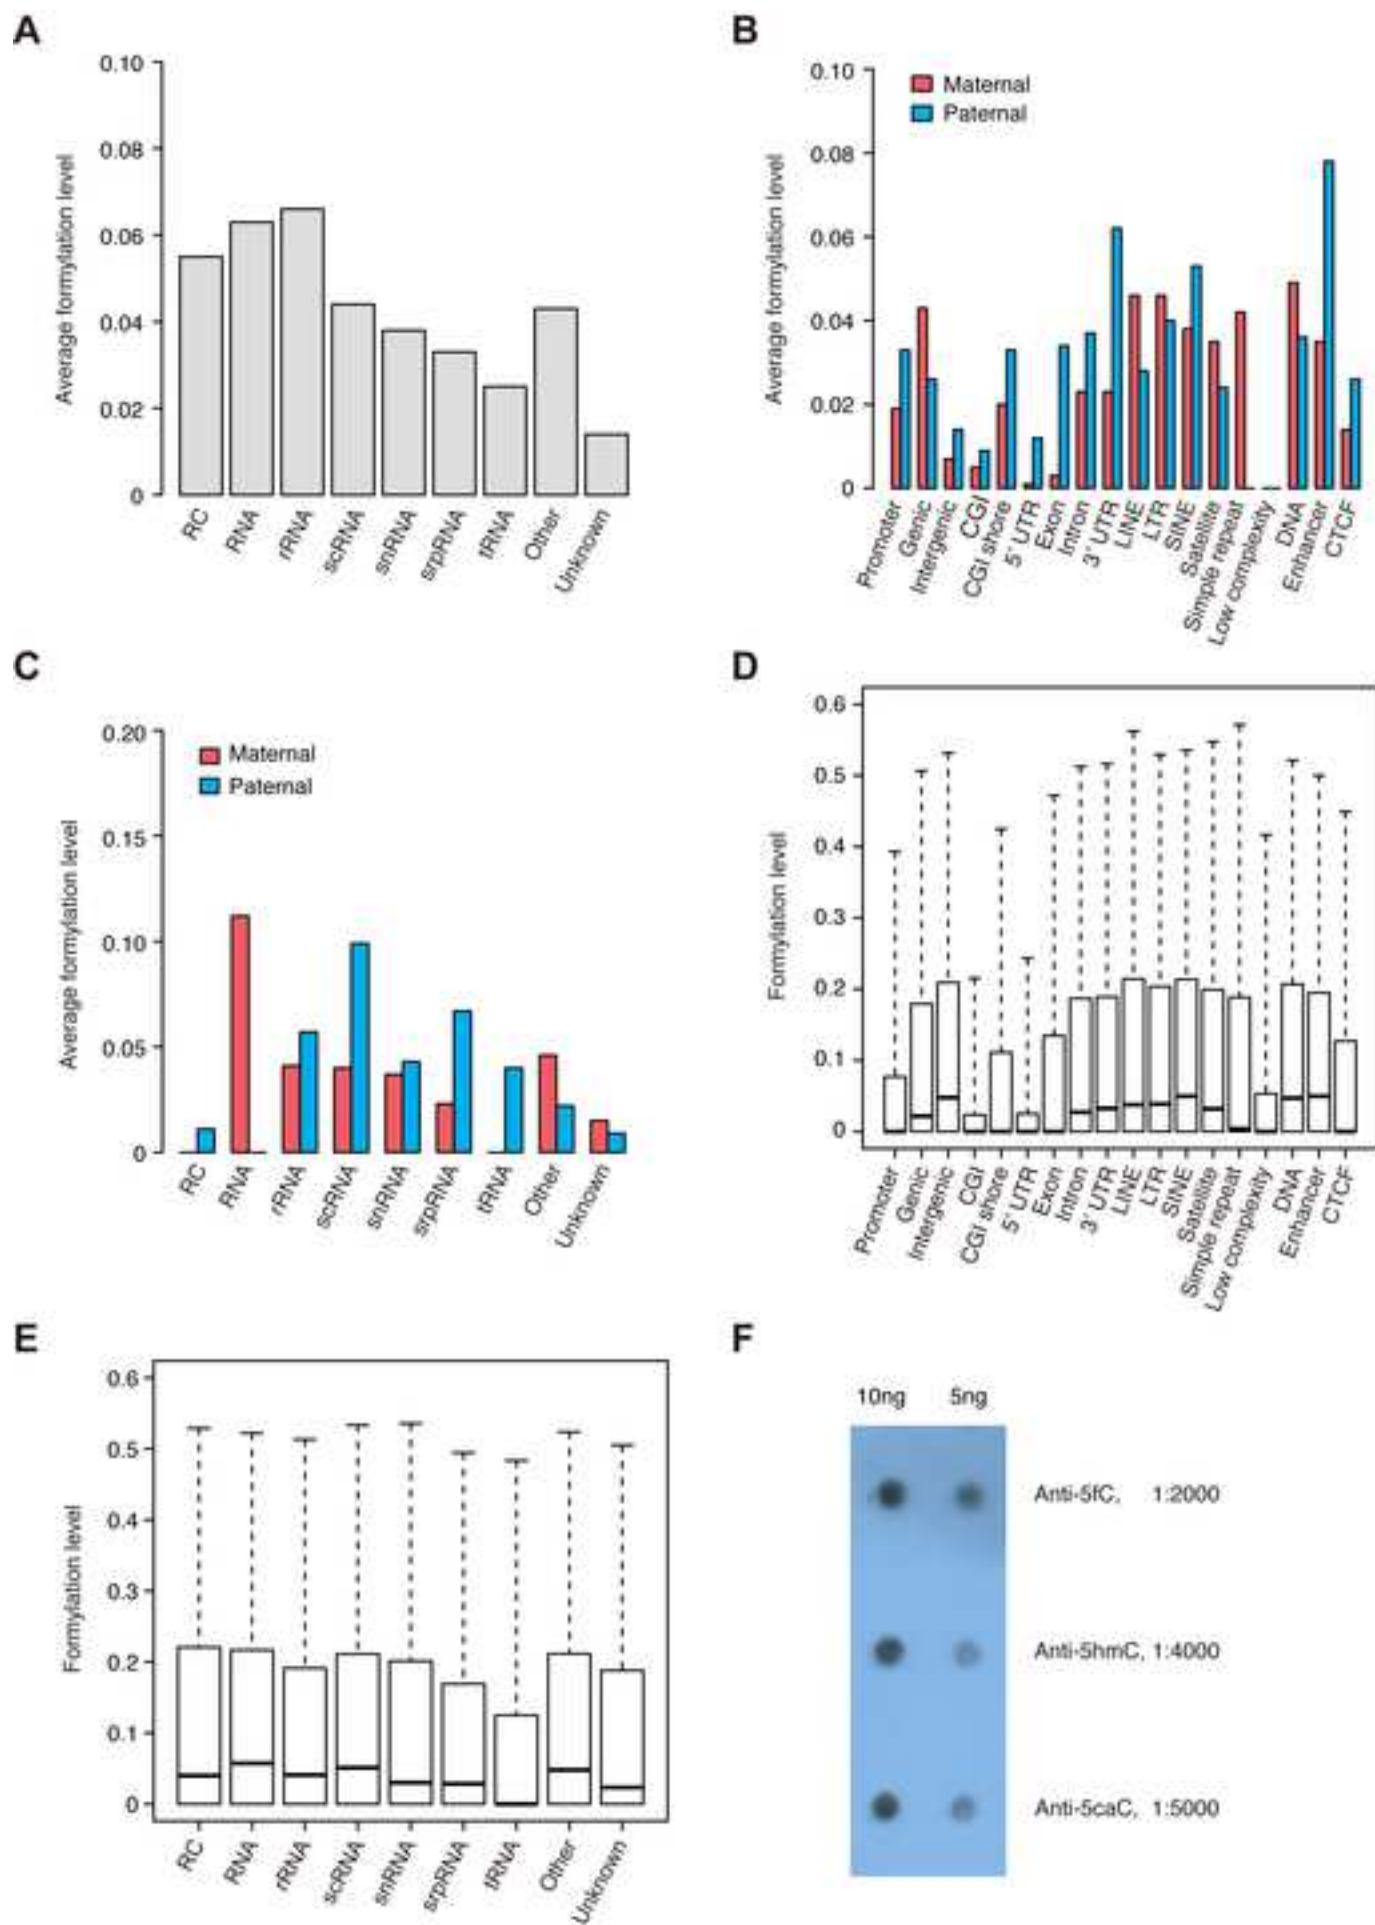

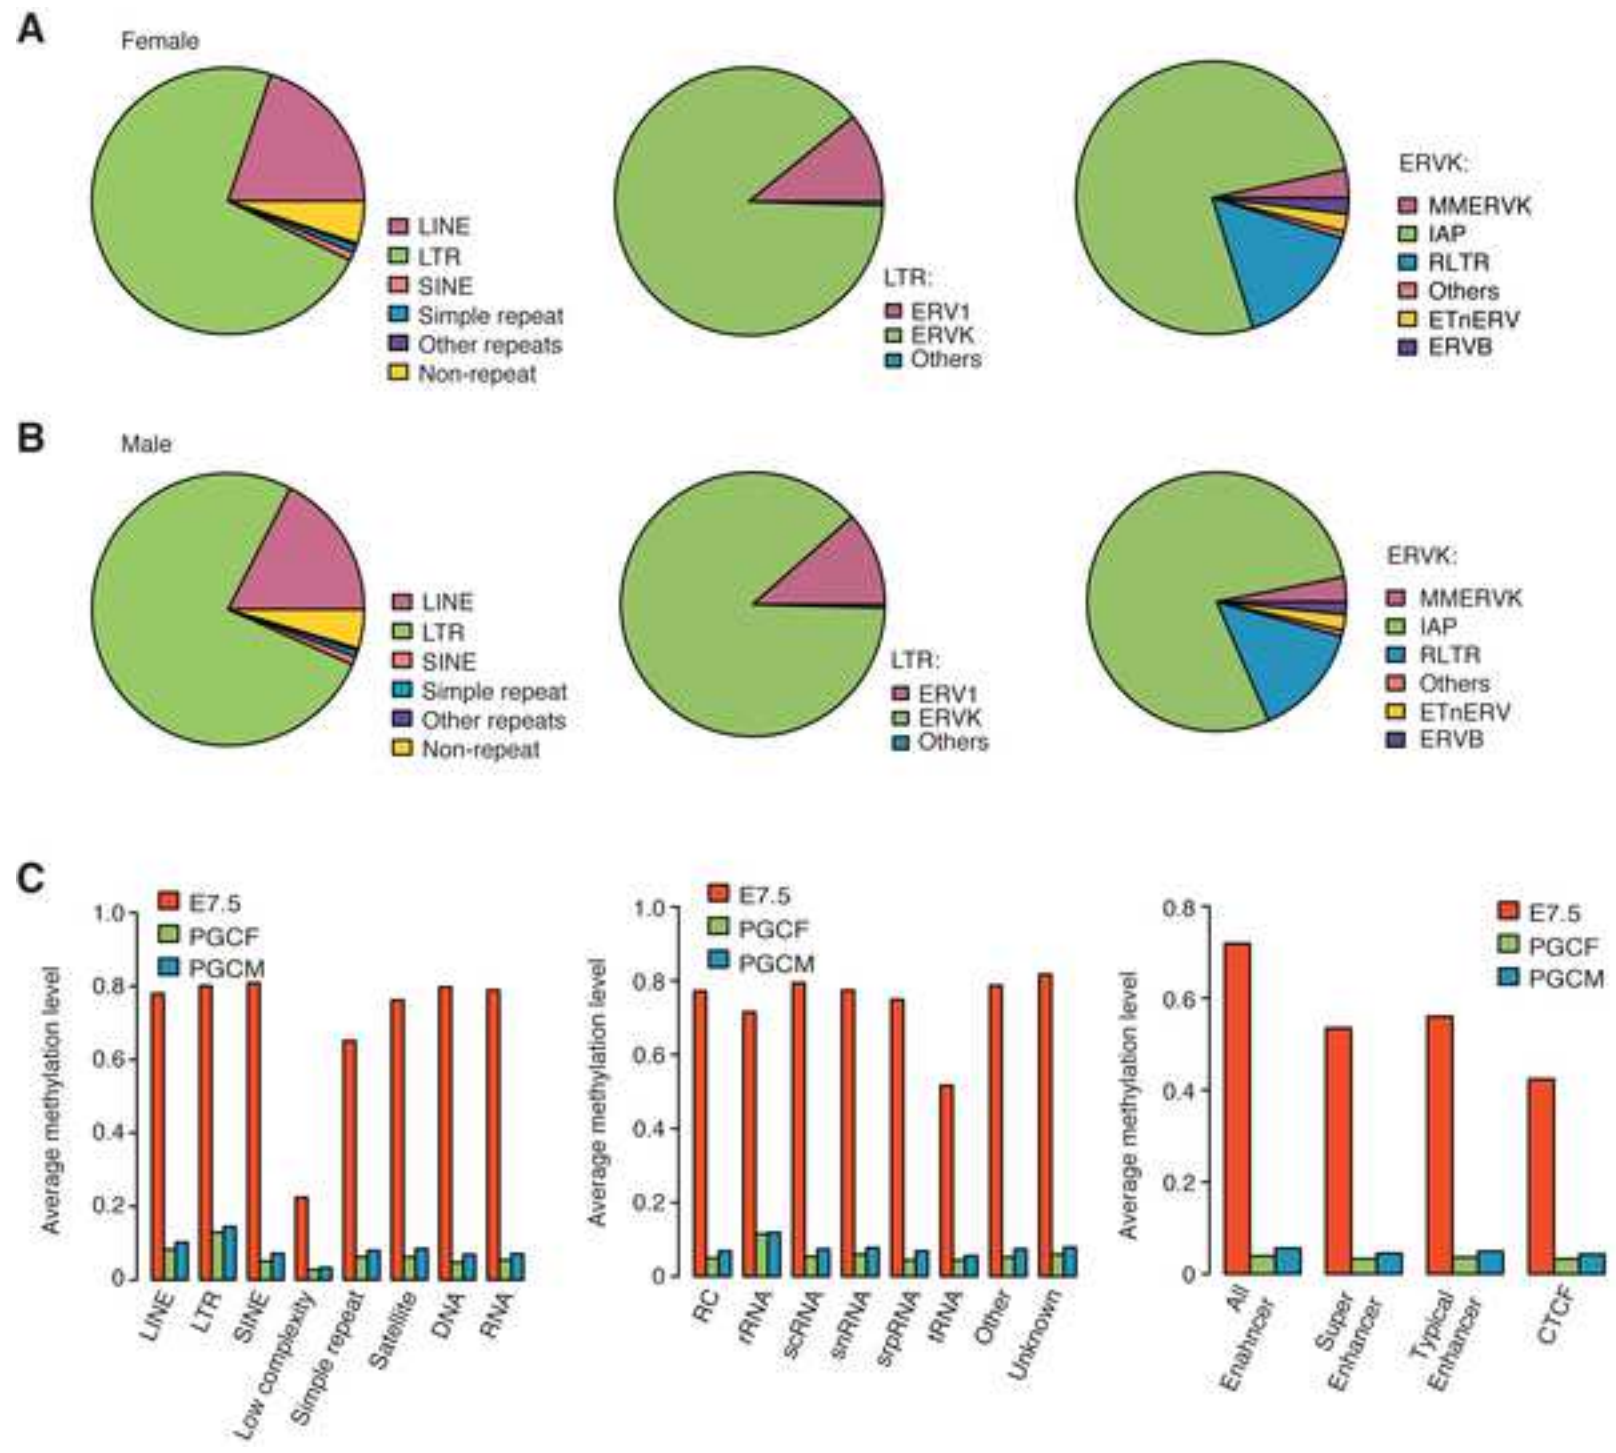

Supplement: NIHMS600093-supplement-05.pdf [file NIHMS600093-supplement-05.pdf]
